## Correction: Implications of PI3K/AKT inhibition on REST protein stability and neuroendocrine phenotype acquisition in prostate cancer cells

Ruiqi Chen<sup>1</sup>, Yinan Li<sup>1</sup>, Ralph Buttyan<sup>1</sup> and Xuesen Dong<sup>1</sup>

<sup>1</sup> Vancouver Prostate Center, Department of Urologic Sciences, The University of British Columbia, Vancouver, Canada

**Published:** July 03, 2018

**Copyright:** Chen et al. This is an open-access article distributed under the terms of the Creative Commons Attribution License 3.0 (CC BY 3.0), which permits unrestricted use, distribution, and reproduction in any medium, provided the original author and source are credited.

**This article has been corrected:** The corrected author name is given below:

**Ruiqi Chen**

Original article: Oncotarget. 2017; 8:84863-84876. <https://doi.org/10.18632/oncotarget.19386>
